# Supplementary material for: A Deep-Learning Hybrid-Predictive-Modeling Approach for Estimating Evapotranspiration and Ecosystem Respiration
Source: Copernicus journal article supplement (doi:10.5194/hess-2020-322), 2020-07-21
Supplement: Supplementary file 1 [file hess-2020-322-supplement.pdf]

# A Deep-Learning Hybrid-Predictive-Modeling Approach for Estimating Evapotranspiration and Ecosystem Respiration

Jiancong Chen<sup>1</sup>, Baptiste Dafflon<sup>2</sup>, Anh Phuong Tran<sup>2,3</sup>, Nicola Falco<sup>2</sup>, and Susan S. Hubbard<sup>2</sup>

<sup>1</sup>Department of Civil and Environmental Engineering, University of California, Berkeley, CA, USA, <sup>2</sup>Earth and Environmental Sciences Area, Lawrence Berkeley National Laboratory, Berkeley, CA, USA, <sup>3</sup>Department of Water Resources Engineering and Technology, Water Resources Institute, 8, Phao Dai Lang, Dong Da, Hanoi, Vietnam

## Supplementary Materials

### 1. Deep Learning Model Configuration

| Layer   | Output Shape | Parameters # | Note                  |
|---------|--------------|--------------|-----------------------|
| LSTM    | [50, 1]      | 11600        |                       |
| LSTM    | [25]         | 7600         |                       |
| Dropout | [25]         | 0            | Rate = 0.1            |
| Dense   | [8]          | 208          | L2 regularizers, 0.01 |
| Dropout | [8]          | 0            | Rate = 0.1            |
| Dense   | [1]          | 9            | Output Layer          |

### 2. HPM and MOD16A2 ET Comparison at East River Watershed

#### ET estimation from HPM and MODIS at DF1

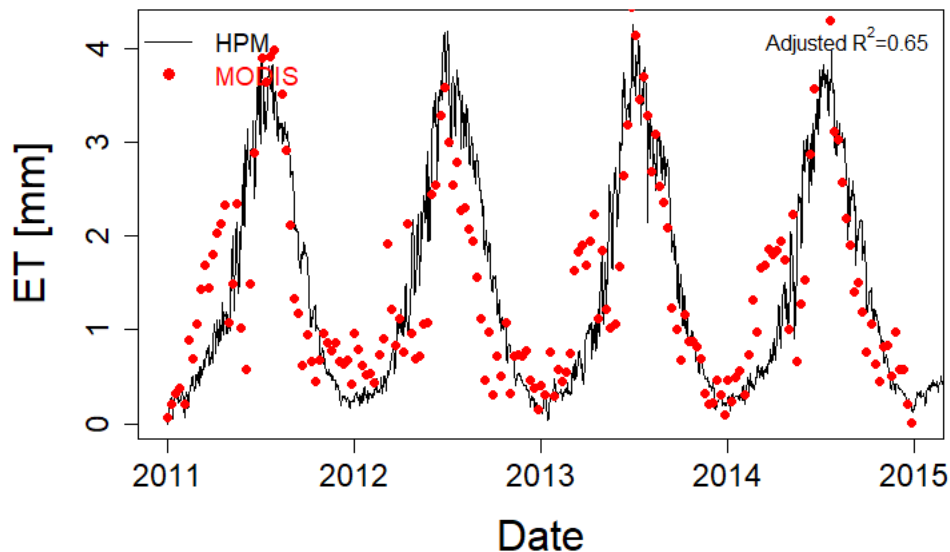

Figure S1. Comparison of 8-day averaged ET estimation from HPM and Mu et al. (2013) at deciduous forests site in East River Watershed.

### 3. CLM performance at US-NR1

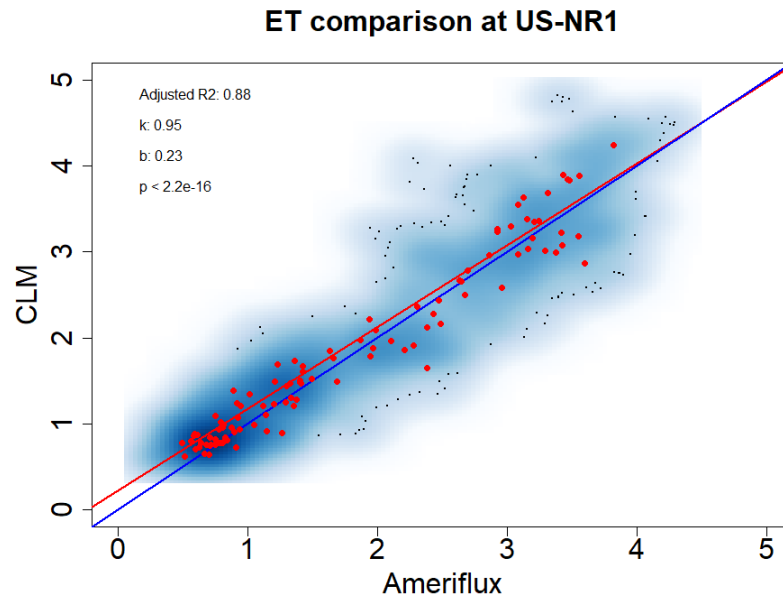

**Figure S2. Comparison of ET estimation from CLM and flux tower measurements at US-NR1. Consistency between CLM estimation and direct measurement from flux tower is observed.**

#### **4. Meteorological forcings heterogeneity within East River Watershed and across SNOTEL stations**

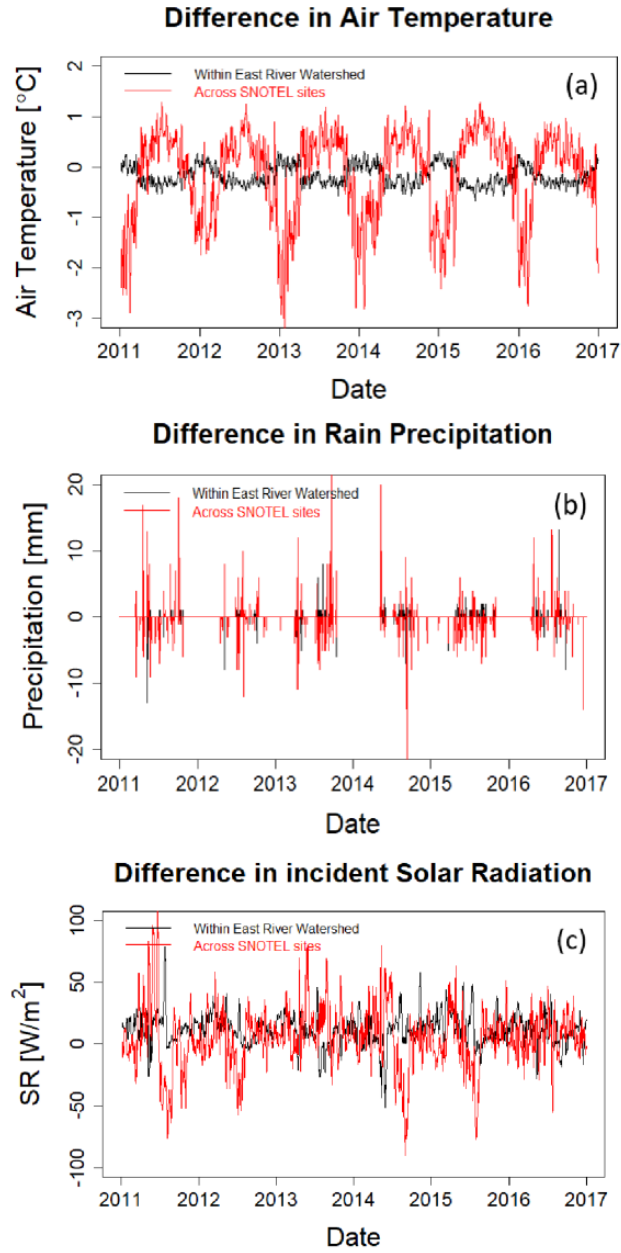

**Figure S3. Meteorological forcings heterogeneity within East River Watersheds (DF1 and EF1, black lines) with DAYMET data and across SNOTEL stations (ER-BT and ER-PK, red lines) with SNOTEL data.**

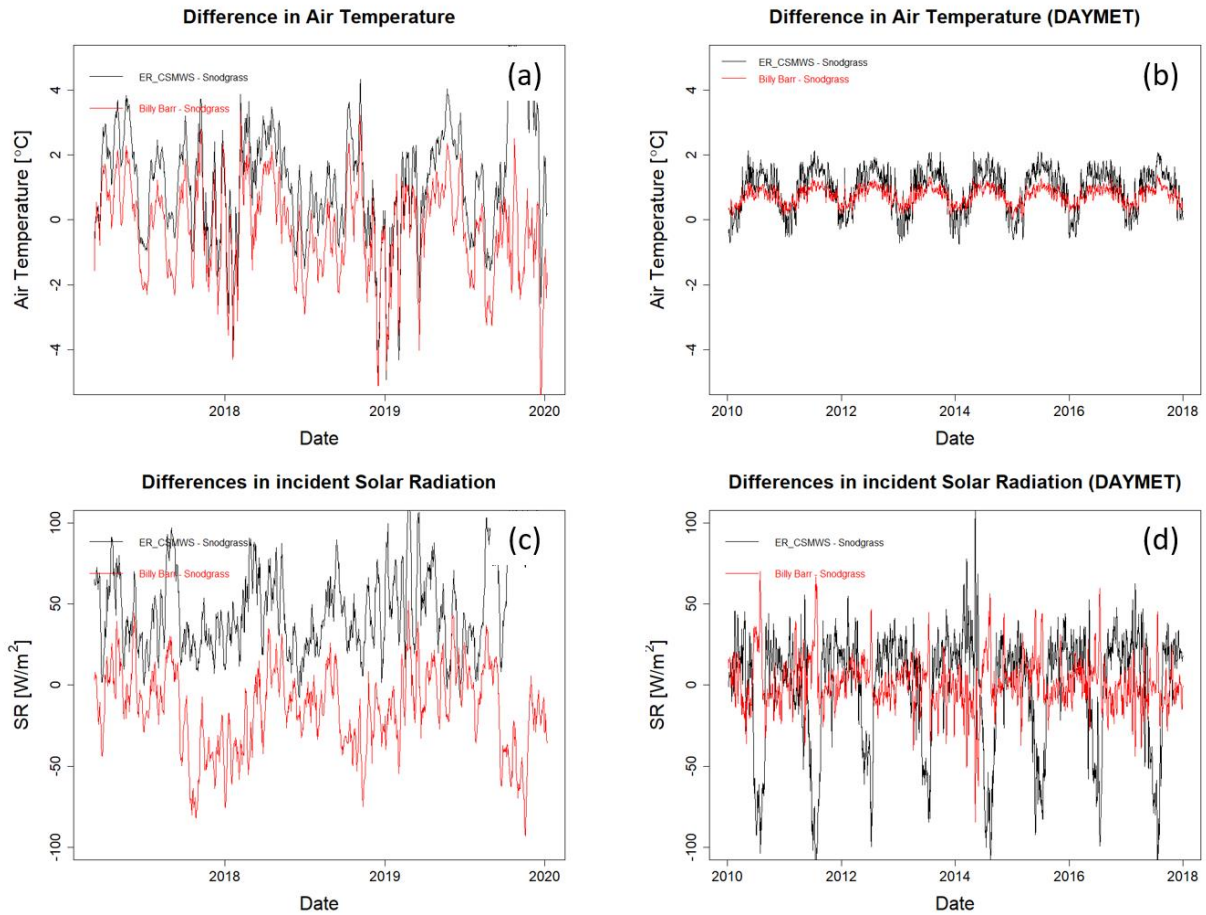

**Figure S4.** Differences in air temperature and incident solar radiation among three weather stations (ER\_CSMWS, Snodgrass and Billy Barr) locations within the East River Watershed. Panel (a) and (c) present data from weather stations obtained from <https://wfsfa-data.lbl.gov/>. Panel (b) and (d) present data obtained from DAYMET.
